# Supplementary material for: Postcode Lottery in Healthcare? Findings from the Scottish National Comprehensive Geriatric Assessment in Secondary Care Audit 2019
Source: MDPI journal article supplement (doi:10.3390/healthcare10010161), 2022-01-14
Supplement: s1 [file s1]

| Health Board | Hospital Code | Band 6 <sup>a</sup><br>Physios -<br>frailty<br>specific | Band 5 <sup>b</sup><br>Physios -<br>frailty<br>specific | Which patients do the<br>physiotherapists see?                                                                              | Total<br>weekday<br>physiot-<br>herapy<br>review<br>time<br>(hours) | Mean<br>physiothe-<br>rapy<br>review<br>time Mon-<br>Fri (hours) | Total<br>weekend<br>physiot-<br>herapy<br>review<br>time | Mean<br>physiot-<br>herapy<br>review<br>time<br>Sat/Sun |
|--------------|---------------|---------------------------------------------------------|---------------------------------------------------------|-----------------------------------------------------------------------------------------------------------------------------|---------------------------------------------------------------------|------------------------------------------------------------------|----------------------------------------------------------|---------------------------------------------------------|
| C            | 1             | 3                                                       | 0                                                       | All patients admitted to acute<br>geriatrics                                                                                | 0                                                                   | 0                                                                | 0                                                        | 0                                                       |
| C            | 2             | 0                                                       | 0                                                       | Patients referred by<br>medical/nursing staff and those<br>from outside unit                                                | 0                                                                   | 0                                                                | 0                                                        | 0                                                       |
| I            | 3             | 1                                                       | 0                                                       | Patients referred by<br>medical/nursing staff                                                                               | 40                                                                  | 8                                                                | 10                                                       | 5                                                       |
| D            | 4             | 0                                                       | 0                                                       | n/a                                                                                                                         | 0                                                                   | 0                                                                | 0                                                        | 0                                                       |
| G            | 5             | 3.6                                                     | 0                                                       | Patients >65 years old who 'screen<br>positive' for Frailty                                                                 | 50                                                                  | 10                                                               | 20                                                       | 10                                                      |
| J            | 6             | 1                                                       | 1                                                       | Patients that screen positive for<br>frailty                                                                                | 40                                                                  | 8                                                                | 16                                                       | 8                                                       |
| F            | 8             | 0                                                       | 0                                                       | All patients admitted to acute<br>geriatrics                                                                                | 15                                                                  | 3                                                                | 6                                                        | 3                                                       |
| F            | 7             | 2                                                       | 1                                                       | All patients admitted to acute<br>geriatrics                                                                                | 55                                                                  | 11                                                               | 8                                                        | 4                                                       |
| L            | 9             | 0                                                       | 0                                                       | Physios decide on appropriate<br>patients for them to see                                                                   | 43                                                                  | 8.6                                                              | 0                                                        | 0                                                       |
| L            | 11            | 1                                                       | 0                                                       | All patients admitted to acute<br>geriatrics                                                                                | 25                                                                  | 5                                                                | 0                                                        | 0                                                       |
| L            | 10            | 1                                                       | 0                                                       | Decide as a frailty team depending<br>on patient presentation                                                               | 40                                                                  | 8                                                                | 0                                                        | 0                                                       |
| L            | 12            | 1                                                       | 0                                                       | Patients referred by<br>medical/nursing staff                                                                               | 25                                                                  | 5                                                                | 0                                                        | 0                                                       |
| E            | 24            | 0                                                       | 0                                                       | Patients referred by<br>medical/nursing staff                                                                               | 20                                                                  | 4                                                                | 0                                                        | 0                                                       |
| E            | 23            | 0                                                       | 0                                                       | n/a                                                                                                                         | 0                                                                   | 0                                                                | 0                                                        | 0                                                       |
| E            | 21            | 0.8                                                     | 0.2                                                     | Patients referred by<br>medical/nursing staff                                                                               | 25                                                                  | 5                                                                | 0                                                        | 0                                                       |
| E            | 22            | 0                                                       | 0                                                       | Patients referred by<br>medical/nursing staff                                                                               | 2                                                                   | 0.4                                                              | 0                                                        | 0                                                       |
| K            | 14            | 0                                                       | 0                                                       | n/a                                                                                                                         | 0                                                                   | 0                                                                | 0                                                        | 0                                                       |
| K            | 15            | 1                                                       | 0                                                       | Patients thought able to be<br>discharged straight from receiving<br>unit - referred by acute physician<br>or geriatrician. | 39                                                                  | 7.8                                                              | 0                                                        | 0                                                       |
| K            | 13            | 1                                                       | 0                                                       | Patients referred by<br>medical/nursing staff                                                                               | 35                                                                  | 7                                                                | 6                                                        | 3                                                       |
| M            | 18            | 1                                                       | 1                                                       | Patients referred by<br>medical/nursing staff                                                                               | 0                                                                   | 0                                                                | 0                                                        | 0                                                       |
| M            | 16            | 0                                                       | 0                                                       | n/a                                                                                                                         | 0                                                                   | 0                                                                | 0                                                        | 0                                                       |
| M            | 17            | 2                                                       | 0                                                       | Physios decide on appropriate<br>patients for them to see                                                                   | 40                                                                  | 8                                                                | 16                                                       | 8                                                       |
| A            | 25            | 0                                                       | 0.5                                                     | Patients referred by<br>medical/nursing staff                                                                               | 30                                                                  | 6                                                                | 0                                                        | 0                                                       |
| H            | 20            | 1                                                       | 0                                                       | All patients admitted to acute<br>geriatrics                                                                                | 35                                                                  | 7                                                                | 10                                                       | 5                                                       |
| H            | 19            | 0.5                                                     | 0.5                                                     | Patients referred by<br>medical/nursing staff                                                                               | 40                                                                  | 8                                                                | 0                                                        | 0                                                       |
| B            | 26            | 0                                                       | 0                                                       | n/a                                                                                                                         | 0                                                                   | 0                                                                | 0                                                        | 0                                                       |
| Mean         |               | 0.8                                                     | 0.2                                                     |                                                                                                                             | 23.0                                                                | 4.6                                                              | 3.5                                                      | 1.8                                                     |

<sup>a</sup>Specialist physiotherapist

<sup>b</sup>Physiotherapist
