# Supplementary material for: Postcode Lottery in Healthcare? Findings from the Scottish National Comprehensive Geriatric Assessment in Secondary Care Audit 2019
Source: MDPI journal article supplement (doi:10.3390/healthcare10010161), 2022-01-14
Supplement: s1 [file s1]

|              |               | How many MDTs <sup>a</sup> are there on each day? |                 | Who regularly joins the MDT <sup>a</sup> ? |           |             |                  |                 |                  |                  |            |           |             |                        |                   |                                   |                                 |
|--------------|---------------|---------------------------------------------------|-----------------|--------------------------------------------|-----------|-------------|------------------|-----------------|------------------|------------------|------------|-----------|-------------|------------------------|-------------------|-----------------------------------|---------------------------------|
| Health Board | Hospital Code | Monday-Friday                                     | Saturday-Sunday | Consultant                                 | Registrar | Staff Nurse | Specialist Nurse | Auxiliary Nurse | OTs <sup>b</sup> | PTs <sup>c</sup> | Pharmacist | Dietician | Social Work | Discharge Co-ordinator | Hopstat@Home Trep | Others                            | Doyouhave shared patient notes? |
| C            | 1             | 1                                                 | 0               | Y                                          | N         | Y           | N                | N               | Y                | Y                | Y          | N         | Y           | Y                      | N                 | Senior charge nurse, Flow manager | N                               |
|              | 2             | 0                                                 | 0               | N                                          | N         | N           | N                | N               | N                | N                | N          | N         | N           | N                      | N                 |                                   | Y                               |
| I            | 3             | 1                                                 | 0               | Y                                          | N         | N           | Y                | N               | Y                | Y                | N          | N         | N           | N                      | N                 | Red cross                         | Y                               |
| D            | 4             | 0                                                 | 0               | N                                          | N         | N           | N                | N               | N                | N                | N          | N         | N           | N                      | N                 |                                   | Y                               |
| G            | 5             | 1                                                 | 0               | Y                                          | N         | N           | Y                | N               | Y                | Y                | N          | N         | N           | Y                      | N                 |                                   | Y                               |
| J            | 6             | ≥2                                                | 1               | Y                                          | Y         | Y           | Y                | N               | Y                | Y                | N          | N         | N           | N                      | N                 |                                   | Y                               |
| F            | 8             | 1                                                 | 0               | Y                                          | N         | Y           | Y                | N               | Y                | Y                | N          | N         | Y           | Y                      | N                 | District nurse                    | N                               |
|              | 7             | ≥2                                                | 1               | Y                                          | Y         | Y           | Y                | N               | Y                | Y                | N          | N         | N           | Y                      | N                 |                                   | Y                               |
| L            | 9             | 1                                                 | 0               | N                                          | N         | N           | Y                | N               | Y                | Y                | N          | N         | N           | N                      | N                 |                                   | Y                               |
|              | 11            | ≥2                                                | 0               | Y                                          | N         | Y           | Y                | N               | Y                | Y                | N          | N         | N           | N                      | N                 |                                   | N                               |
|              | 10            | ≥2                                                | 1               | Y                                          | N         | Y           | Y                | N               | Y                | Y                | N          | N         | Y           | Y                      | N                 |                                   | N                               |
|              | 12            | 0                                                 | 0               | N                                          | N         | N           | N                | N               | N                | N                | N          | N         | N           | N                      | N                 |                                   | N                               |
| E            | 24            | 1                                                 | 0               | Y                                          | N         | Y           | N                | N               | Y                | Y                | N          | N         | Y           | N                      | N                 | Junior doctors and students       | N                               |
|              | 23            | 0                                                 | 0               | N                                          | N         | N           | N                | N               | N                | N                | N          | N         | N           | N                      | N                 |                                   | N                               |
|              | 21            | 0                                                 | 0               | N                                          | N         | N           | N                | N               | N                | N                | N          | N         | N           | N                      | N                 |                                   | N                               |
|              | 22            | 0                                                 | 0               | N                                          | N         | N           | N                | N               | N                | N                | N          | N         | N           | N                      | N                 |                                   | N                               |
| K            | 14            | 1                                                 | 0               | Y                                          | Y         | Y           | Y                | Y               | Y                | Y                | N          | N         | N           | N                      | N                 | Junior doctors                    | Y                               |
|              | 15            | 1                                                 | 0               | Y                                          | Y         | Y           | N                | N               | Y                | Y                | N          | N         | N           | Y                      | N                 |                                   | Y                               |
|              | 13            | 1                                                 | 0               | Y                                          | N         | N           | Y                | N               | Y                | Y                | Y          | N         | N           | N                      | N                 |                                   | Y                               |
| M            | 18            | 1                                                 | 0               | Y                                          | N         | Y           | N                | Y               | Y                | Y                | N          | N         | N           | N                      | N                 |                                   | Y                               |
|              | 16            | 1                                                 | 0               | Y                                          | Y         | Y           | N                | Y               | Y                | Y                | N          | N         | Y           | Y                      | N                 |                                   | Y                               |
|              | 17            | 0                                                 | 0               | N                                          | N         | N           | N                | N               | Y                | Y                | N          | N         | N           | N                      | N                 |                                   | Y                               |
| A            | 25            | 0                                                 | 0               | N                                          | N         | Y           | N                | N               | Y                | Y                | N          | N         | N           | N                      | N                 |                                   | N                               |
| H            | 20            | ≥2                                                | ≥2              | Y                                          | N         | Y           | N                | N               | Y                | Y                | Y          | N         | Y           | Y                      | N                 |                                   | Y                               |
|              | 19            | ≥2                                                | 0               | Y                                          | N         | Y           | Y                | N               | Y                | Y                | Y          | N         | Y           | Y                      | N                 |                                   | N                               |
| B            | 26            | 0                                                 | 0               | N                                          | N         | Y           | N                | N               | Y                | Y                | Y          | N         | Y           | Y                      | N                 |                                   | Y                               |

<sup>a</sup>Multidisciplinary Team

<sup>b</sup>Occupational therapist

<sup>c</sup>Physiotherapist
