# Supplementary material for: Postcode Lottery in Healthcare? Findings from the Scottish National Comprehensive Geriatric Assessment in Secondary Care Audit 2019
Source: MDPI journal article supplement (doi:10.3390/healthcare10010161), 2022-01-14
Supplement: s1 [file s1]

| Health Board | Hospital Code | Where are acutely admitted frail older adults cared for?                                                                                       | Age Criteria for patient to qualify for bed under care of acute geriatrics | Other Criteria for patient to qualify for bed under care of acute geriatrics                                                                                  |
|--------------|---------------|------------------------------------------------------------------------------------------------------------------------------------------------|----------------------------------------------------------------------------|---------------------------------------------------------------------------------------------------------------------------------------------------------------|
| C            | 1             | Combined Assessment Unit - for all ages of medical patients                                                                                    | 65 years and over                                                          | Using the clinical frailty score (5-7) and accepted by Acute Care of the Elderly Practitioners                                                                |
| C            | 2             | General Medical Ward                                                                                                                           | No                                                                         | Assessment by Geriatrician or Experienced AHP                                                                                                                 |
| I            | 3             | AMU and specific DME wards                                                                                                                     | 65 years and over                                                          | Falls and instability, care home resident, delirium or dementia, difficulties with ADLs and polypharmacy                                                      |
| D            | 4             | Care of the Elderly Ward                                                                                                                       | 75 years and over                                                          | No                                                                                                                                                            |
| G            | 5             | 2 General Medical Wards for frail elderly patients                                                                                             | 65 years and over                                                          | Frailty screening tool, depending on resident of a carehome, new functional decline, dementia, acute confusion, falls, mobility and fear of falling.          |
| J            | 6             | Ageing & Health ward                                                                                                                           | No                                                                         | Screened for frailty                                                                                                                                          |
| L            | 12            | General Medical Ward                                                                                                                           | 65 years and over                                                          | No                                                                                                                                                            |
| E            | 24            | General Medical Ward                                                                                                                           | No                                                                         | No                                                                                                                                                            |
| E            | 23            | General medical wards                                                                                                                          | 65 years and over                                                          | Falls and instability, Care home residents, Delirium/dementia, Difficulties with ADLs, Polypharmacy                                                           |
| E            | 21            | Medicine for the elderly ward and post-acute ward under the care of a geriatrician.                                                            | No                                                                         | No                                                                                                                                                            |
| E            | 22            | General Medical Ward                                                                                                                           | No                                                                         | No                                                                                                                                                            |
| K            | 15            | All patients are admitted to an Emergency medical ward, if appropriate assessed by a Geriatrician and then sent to a Geriatric Assessment ward | 65 years and over                                                          | No need for subspecialty input                                                                                                                                |
| K            | 13            | Can be directly admitted to care of the elderly wards                                                                                          | 65 years and over                                                          | Frailty - falls, confusion, immobility, multiple co-morbidities and not requiring specialty input. Care home residents. Fractures for non-surgical management |
| M            | 18            | Acute Medical Assessment Unit                                                                                                                  | 65 years and over                                                          | Yes                                                                                                                                                           |
| M            | 16            | Medical Admissions unit +/- General Medical Ward                                                                                               | N/A                                                                        | N/A                                                                                                                                                           |
| M            | 17            | Acute medical unit                                                                                                                             | 65 years and over                                                          | Younger patients with discussion and consultant review (frailty, PD)                                                                                          |
| A            | 25            | General Medical Ward                                                                                                                           | No                                                                         | No                                                                                                                                                            |
| H            | 19            | General Medical Ward                                                                                                                           | 65 years and over                                                          | Yes                                                                                                                                                           |
| B            | 26            | General Medical Ward                                                                                                                           | N/A                                                                        | N/A                                                                                                                                                           |
