# Supplementary material for: Postcode Lottery in Healthcare? Findings from the Scottish National Comprehensive Geriatric Assessment in Secondary Care Audit 2019
Source: MDPI journal article supplement (doi:10.3390/healthcare10010161), 2022-01-14
Supplement: s1 [file s1]

| Health Board | Hospital Name | Referred from ED <sup>a</sup> to Geriatrician led Care | Referred from Acute Medicine to Geriatrician led Care | Referred by Geriatrician based in Acute Medicine to Geriatrician led Care | Direct GP <sup>b</sup> admissions to Geriatrician led care | What is the normal pathway for patients requiring hospital stay after initial CGA <sup>c</sup> ?                                                                                                              |
|--------------|---------------|--------------------------------------------------------|-------------------------------------------------------|---------------------------------------------------------------------------|------------------------------------------------------------|---------------------------------------------------------------------------------------------------------------------------------------------------------------------------------------------------------------|
| C            | 1             | Yes                                                    | No                                                    | Yes                                                                       | No                                                         | Patient stays in same area which also serves as downstream bed base                                                                                                                                           |
| C            | 2             | No                                                     | No                                                    | No                                                                        | No                                                         | Patient stays in same area which also serves as downstream bed base                                                                                                                                           |
| I            | 3             | No                                                     | No                                                    | Yes                                                                       | Yes                                                        | Downstream ward specifically for geriatric patients                                                                                                                                                           |
| D            | 4             | No                                                     | No                                                    | No                                                                        | No                                                         | Downstream ward specifically for geriatric patients                                                                                                                                                           |
| G            | 5             | No                                                     | No                                                    | Yes                                                                       | Yes                                                        | Downstream ward specifically for geriatric patients                                                                                                                                                           |
| J            | 6             | Yes                                                    | Yes                                                   | No                                                                        | Yes                                                        | Downstream ward specifically for geriatric patients                                                                                                                                                           |
| F            | 8             | Yes                                                    | No                                                    | No                                                                        | No                                                         | Patient stays in same area which also serves as downstream bed base                                                                                                                                           |
| F            | 7             | Yes                                                    | Yes                                                   | No                                                                        | No                                                         | Downstream ward specifically for geriatric patients                                                                                                                                                           |
| L            | 9             | Yes                                                    | Yes                                                   | No                                                                        | No                                                         | Downstream ward specifically for geriatric patients                                                                                                                                                           |
| L            | 11            | Yes                                                    | Yes                                                   | No                                                                        | No                                                         | Downstream ward specifically for geriatric patients                                                                                                                                                           |
| L            | 10            | Yes                                                    | Yes                                                   | No                                                                        | No                                                         | Downstream ward specifically for geriatric patients                                                                                                                                                           |
| L            | 12            | No                                                     | Yes                                                   | Yes                                                                       | No                                                         | Patient moves to general medical ward, not under care of geriatrician                                                                                                                                         |
| E            | 24            | No                                                     | Yes                                                   | No                                                                        | No                                                         | Patient moves to general medical ward, still under care of a geriatrician                                                                                                                                     |
| E            | 23            | No                                                     | No                                                    | No                                                                        | No                                                         | Patient stays in same area which also serves as downstream bed base                                                                                                                                           |
| E            | 21            | No                                                     | Yes                                                   | No                                                                        | No                                                         | Downstream ward specifically for geriatric patients                                                                                                                                                           |
| K            | 14            | No                                                     | No                                                    | Yes                                                                       | No                                                         | Downstream ward specifically for geriatric patients                                                                                                                                                           |
| K            | 15            | No                                                     | No                                                    | Yes                                                                       | No                                                         | Downstream ward specifically for geriatric patients                                                                                                                                                           |
| K            | 13            | No                                                     | No                                                    | No                                                                        | No                                                         | Downstream ward specifically for geriatric patients                                                                                                                                                           |
| M            | 18            | No                                                     | Yes                                                   | No                                                                        | Yes                                                        | Various: Patient stays in same area which also serves as downstream bed base; Downstream ward specifically for geriatric patients; Patients are cared for in general medical wards, they receive CGA if frail |
| M            | 16            | No                                                     | No                                                    | No                                                                        | No                                                         | Patients are cared for in general medical wards, they receive CGA if frail                                                                                                                                    |
| M            | 17            | No                                                     | Yes                                                   | Yes                                                                       | No                                                         | Downstream ward specifically for geriatric patients                                                                                                                                                           |
| H            | 20            | No                                                     | No                                                    | Yes                                                                       | No                                                         | Downstream ward specifically for geriatric patients                                                                                                                                                           |
| H            | 19            | Yes                                                    | yes                                                   | Yes                                                                       | No                                                         | Patient moves to general medical ward, still under care of a geriatrician                                                                                                                                     |

<sup>a</sup>Emergency department

<sup>b</sup>General Practitioner

<sup>c</sup>Comprehensive Geriatric Assessment
