# Supplementary material for: Postcode Lottery in Healthcare? Findings from the Scottish National Comprehensive Geriatric Assessment in Secondary Care Audit 2019
Source: MDPI journal article supplement (doi:10.3390/healthcare10010161), 2022-01-14
Supplement: s1 [file s1]

| Hospital Code | Health Board | How many band 6 <sup>a</sup> or above occupational therapists are employed specifically to review acute geriatric admissions in 24 hours? | How many band 5 <sup>b</sup> occupational therapists are employed specifically to review acute geriatric admissions in 24 hours? | Which patients do the occupational therapists see? | Which patients do the occupational therapists see? Description of 'other' | Total weekly occupational therapy review time | Total occupational therapy review time Mon-Fri | Mean weekday occupational therapy review time | Total weekend occupational therapy review time | Mean weekend occupational therapy review time |
|---------------|--------------|-------------------------------------------------------------------------------------------------------------------------------------------|----------------------------------------------------------------------------------------------------------------------------------|----------------------------------------------------|---------------------------------------------------------------------------|-----------------------------------------------|------------------------------------------------|-----------------------------------------------|------------------------------------------------|-----------------------------------------------|
| 1             | C            | 2                                                                                                                                         | 3                                                                                                                                | All patients admitted to acute geriatrics          |                                                                           | 0                                             | 0                                              | 0                                             | 0                                              | 0                                             |
| 2             | C            | 0                                                                                                                                         | 0                                                                                                                                | Those referred by medical/nursing staff            |                                                                           | 0                                             | 0                                              | 0                                             | 0                                              | 0                                             |
| 3             | I            | 1.4                                                                                                                                       | 0                                                                                                                                | Those referred by medical/nursing staff            |                                                                           | 50                                            | 40                                             | 8                                             | 10                                             | 5                                             |
| 4             | D            | 0                                                                                                                                         | 0                                                                                                                                | n/a                                                |                                                                           | 0                                             | 0                                              | 0                                             | 0                                              | 0                                             |

|    |   |     |     |                                           |                                                                                                        |    |    |     |    |    |
|----|---|-----|-----|-------------------------------------------|--------------------------------------------------------------------------------------------------------|----|----|-----|----|----|
| 5  | G | 3   | 0   | other                                     | Patients>65yearsoldwho'sscreen positive'forFrailty,usingCGAtool                                        | 70 | 50 | 10  | 20 | 10 |
| 6  | J | 2   | 0   | Other                                     | If screened frailty positive then the OTs will see them - this is discussed after the morning handover | 56 | 40 | 8   | 16 | 8  |
| 8  | F | 0   | 0   | All patients admitted to acute geriatrics |                                                                                                        | 24 | 20 | 4   | 2  | 1  |
| 7  | F | 3   | 1   | All patients admitted to acute geriatrics |                                                                                                        | 58 | 50 | 10  | 8  | 4  |
| 9  | L | 0   | 0   | OTs decide which require their input      |                                                                                                        | 43 | 43 | 8.6 | 0  | 0  |
| 11 | L | 0.6 | 0.4 | All patients admitted to acute geriatrics |                                                                                                        | 25 | 25 | 5   | 0  | 0  |

|    |   |   |   |                                         |                                                                                                             |    |    |   |   |   |
|----|---|---|---|-----------------------------------------|-------------------------------------------------------------------------------------------------------------|----|----|---|---|---|
| 10 | L | 1 | 0 | other                                   | Decide as a team on the ground floor which patients they will see there is a cross fertilisation of skills. | 40 | 40 | 8 | 0 | 0 |
| 12 | L | 1 | 0 | Those referred by medical/nursing staff |                                                                                                             | 30 | 30 | 6 | 0 | 0 |
| 24 | E |   |   | Those referred by medical/nursing staff |                                                                                                             | 20 | 20 | 4 | 0 | 0 |
| 23 | E | 1 | 0 | Those referred by medical/nursing staff |                                                                                                             |    |    |   |   |   |
| 21 | E | 2 |   | Those referred by medical/nursing staff |                                                                                                             | 35 | 35 | 7 | 0 | 0 |

|    |   |   |   |                                         |                                                                    |    |    |     |   |   |
|----|---|---|---|-----------------------------------------|--------------------------------------------------------------------|----|----|-----|---|---|
| 22 | E | 0 | 0 | Those referred by medical/nursing staff |                                                                    | 2  | 2  | 0.4 | 0 | 0 |
| 14 | K |   |   | n/a                                     |                                                                    | 0  | 0  | 0   | 0 | 0 |
| 15 | K | 1 | 0 | Other                                   | Those patients thought able to go home direct from receiving ward. | 40 | 40 | 8   | 0 | 0 |
| 13 | K | 1 | 0 | Those referred by medical/nursing staff |                                                                    | 41 | 35 | 7   | 6 | 3 |
| 18 | M | 1 | 1 | Other                                   | Can also be referred to by acute medics or MOE team                | 0  | 0  | 0   | 0 | 0 |
| 16 | M | 0 | 0 | Those referred by medical/nursing staff |                                                                    | 0  | 0  | 0   | 0 | 0 |

|    |   |   |   |                                           |                                                    |    |    |   |    |   |
|----|---|---|---|-------------------------------------------|----------------------------------------------------|----|----|---|----|---|
| 17 | M | 2 |   | OTs decide which require their input      | Others where indicated after geriatrics ward round | 56 | 40 | 8 | 16 | 8 |
| 25 | A |   | 1 | Those referred by medical/nursing staff   |                                                    | 40 | 40 | 8 | 0  | 0 |
| 20 | H | 1 |   | All patients admitted to acute geriatrics |                                                    | 38 | 30 | 6 | 8  | 4 |
| 19 | H | 1 | 0 | Those referred by medical/nursing staff   |                                                    | 35 | 35 | 7 | 0  | 0 |

|    |   |   |   |     |  |   |   |   |   |   |
|----|---|---|---|-----|--|---|---|---|---|---|
| 26 | B | 0 | 0 | n/a |  | 0 | 0 | 0 | 0 | 0 |
|----|---|---|---|-----|--|---|---|---|---|---|

<sup>a</sup>Specialist occupational therapist

<sup>b</sup>Occupational therapist
