# Supplementary material for: Postcode Lottery in Healthcare? Findings from the Scottish National Comprehensive Geriatric Assessment in Secondary Care Audit 2019
Source: MDPI journal article supplement (doi:10.3390/healthcare10010161), 2022-01-14
Supplement: s1 [file s1]

|              |               | Occupational Therapists                                   |                                                   | Physiotherapists                                          |                                                   | Pharmacists                                                            |                                                   | Social Work                                                        | Bed Management                                                  | Old Age Psychiatry                                                               |
|--------------|---------------|-----------------------------------------------------------|---------------------------------------------------|-----------------------------------------------------------|---------------------------------------------------|------------------------------------------------------------------------|---------------------------------------------------|--------------------------------------------------------------------|-----------------------------------------------------------------|----------------------------------------------------------------------------------|
| Health Board | Hospital Code | Do they review new patients within 24 hours of admission? | Are they specifically linked to acute geriatrics? | Do they review new patients within 24 hours of admission? | Are they specifically linked to acute geriatrics? | Do they review new patients' medications within 24 hours of admission? | Are they specifically linked to acute geriatrics? | Are they available for input within 24 hours of patient admission? | Is there a bed manager specifically linked to acute geriatrics? | What is route of access for new patients that need specialist assessment/ input? |
| C            | 1             | yes                                                       | linked                                            | yes                                                       | linked                                            | yes                                                                    | yes                                               | yes                                                                | no                                                              | review within hospital, not same day                                             |
|              | 2             | no                                                        | n/a                                               | yes                                                       | shared                                            | yes                                                                    | no                                                | yes                                                                | no                                                              | review within hospital, not same day                                             |
| I            | 3             | yes                                                       | linked                                            | yes                                                       | linked                                            | yes                                                                    | no                                                | no                                                                 | no                                                              | review within hospital, not same day                                             |
| D            | 4             | no                                                        | n/a                                               | no                                                        | n/a                                               | no                                                                     | n/a                                               | no                                                                 | no                                                              | review within hospital, not same day                                             |
| G            | 5             | yes                                                       | linked                                            | yes                                                       | linked                                            | yes                                                                    | no                                                | no                                                                 | no                                                              | no access on site                                                                |
| J            | 6             | yes                                                       | shared                                            | yes                                                       | shared                                            | yes                                                                    | no                                                | no                                                                 | no                                                              | Review within hospital, not same day                                             |
| F            | 8             | yes                                                       | shared                                            | yes                                                       | shared                                            | yes                                                                    | no                                                | yes                                                                | no                                                              | same day review                                                                  |
|              | 7             | yes                                                       | linked                                            | yes                                                       | linked                                            | yes                                                                    | yes                                               | no                                                                 | no                                                              | same day review                                                                  |
| L            | 9             | yes                                                       | shared                                            | yes                                                       | shared                                            | yes                                                                    | yes                                               | no                                                                 | no                                                              | review within hospital, not same day                                             |
|              | 11            | yes                                                       | linked                                            | yes                                                       | linked                                            | no                                                                     | n/a                                               | no                                                                 | no                                                              | review within hospital, not same day                                             |
|              | 10            | yes                                                       | shared                                            | yes                                                       | shared                                            | yes                                                                    | yes                                               | yes                                                                | yes                                                             | review within hospital, not same day                                             |
|              | 12            | no                                                        | n/a                                               | no                                                        | n/a                                               | no                                                                     | n/a                                               | no                                                                 | no                                                              | review within hospital, not same day                                             |
| E            | 24            | yes                                                       | shared                                            | yes                                                       | shared                                            | no                                                                     | n/a                                               | no                                                                 | no                                                              | no access on site                                                                |
|              | 23            | no                                                        | n/a                                               | no                                                        | n/a                                               | no                                                                     | n/a                                               | no                                                                 | no                                                              | review within hospital, not same day                                             |
|              | 21            | no                                                        | n/a                                               | no                                                        | n/a                                               | no                                                                     | n/a                                               | no                                                                 | no                                                              | no access on site                                                                |
|              | 22            | no                                                        | n/a                                               | no                                                        | n/a                                               | no                                                                     | n/a                                               | no                                                                 | no                                                              | review within hospital, not same day                                             |
| K            | 14            | yes                                                       | shared                                            | yes                                                       | shared                                            | yes                                                                    | no                                                | no                                                                 | no                                                              | review within hospital, not same day                                             |
|              | 15            | yes                                                       | shared                                            | yes                                                       | shared                                            | yes                                                                    | no                                                | yes                                                                | no                                                              | review within hospital, not same day                                             |
|              | 13            | yes                                                       | shared                                            | yes                                                       | shared                                            | yes                                                                    | no                                                | no                                                                 | no                                                              | review within hospital, not same day                                             |
| M            | 18            | yes                                                       | shared                                            | yes                                                       | shared                                            | yes                                                                    | no                                                | no                                                                 | no                                                              | review within hospital, not same day                                             |
|              | 16            | yes                                                       | shared                                            | yes                                                       | shared                                            | no                                                                     | n/a                                               | no                                                                 | no                                                              | review within hospital, not same day                                             |
|              | 17            | yes                                                       | shared                                            | yes                                                       | shared                                            | yes                                                                    | no                                                | no                                                                 | no                                                              | same day review                                                                  |
| A            | 25            | no                                                        | n/a                                               | no                                                        | n/a                                               | yes                                                                    | no                                                | no                                                                 | no                                                              | review within hospital, not same day                                             |
| H            | 20            | yes                                                       | linked                                            | yes                                                       | linked                                            | yes                                                                    | yes                                               | yes                                                                | no                                                              | psychiatrist based in admission setting                                          |
|              | 19            | no                                                        | n/a                                               | yes                                                       | shared                                            | yes                                                                    | no                                                | yes                                                                | no                                                              | same day review                                                                  |
| B            | 26            | no                                                        | n/a                                               | no                                                        | n/a                                               | yes                                                                    | yes                                               | no                                                                 | no                                                              | review within hospital, not same day                                             |
