# Supplementary material for: Postcode Lottery in Healthcare? Findings from the Scottish National Comprehensive Geriatric Assessment in Secondary Care Audit 2019
Source: MDPI journal article supplement (doi:10.3390/healthcare10010161), 2022-01-14
Supplement: s1 [file s1]

| Health Board | Hospital Code | Monday-Friday Total (Hours) | Daily Mean (M-F <sup>a</sup> ) | Weekend Total (Hours) | Daily Mean (S&S <sup>b</sup> ) |
|--------------|---------------|-----------------------------|--------------------------------|-----------------------|--------------------------------|
| C            | 1             | 29                          | 5.8                            | 0                     | 0                              |
|              | 2             | 8                           | 1.6                            | 4                     | 2                              |
| I            | 3             | 20                          | 4                              | 0                     | 0                              |
| D            | 4             | 0                           | 0                              | 0                     | 0                              |
| G            | 5             | 15                          | 3                              | 0                     | 0                              |
| J            | 6             | 60                          | 12.5                           | 25                    | 12.5                           |
| F            | 8             | 15                          | 3                              | 0                     | 0                              |
|              | 7             | 50                          | 10                             | 22                    | 11                             |
| L            | 9             | 40                          | 8                              | 16                    | 8                              |
|              | 11            | 35                          | 7                              | 0                     | 0                              |
|              | 10            | 60                          | 12                             | 24                    | 12                             |
|              | 12            | 0                           | 0                              | 0                     | 0                              |
| E            | 24            | 0                           | 0                              | 0                     | 0                              |
|              | 23            | 0                           | 0                              | 0                     | 0                              |
|              | 21            | 0                           | 0                              | 0                     | 0                              |
|              | 22            | 40                          | 8                              | 0                     | 0                              |
| K            | 14            | 25                          | 5                              | 14                    | 7                              |
|              | 15            | 5                           | 1                              | 4                     | 2                              |
|              | 13            | 27                          | 5.4                            | 6                     | 3                              |
| M            | 18            | 20                          | 4                              | 2                     | 1                              |
|              | 16            | 8                           | 1.6                            | 0                     | 0                              |
|              | 17            | 30                          | 6                              | 8                     | 4                              |
| A            | 25            | 50                          | 10                             | 20                    | 10                             |
| H            | 20            | 12                          | 2.4                            | 18                    | 9                              |
|              | 19            | 40                          | 8                              | 0                     | 0                              |
| B            | 26            | 0                           | 0                              | 0                     | 0                              |
| Mean (hours) |               | 22.7                        | 4.6                            | 6.3                   | 3.1                            |

<sup>a</sup>Monday to Friday

<sup>b</sup>Saturday and Sunday
