# Supplementary material for: Postcode Lottery in Healthcare? Findings from the Scottish National Comprehensive Geriatric Assessment in Secondary Care Audit 2019
Source: MDPI journal article supplement (doi:10.3390/healthcare10010161), 2022-01-14
Supplement: s1 [file s1]

| Health Board | Hospital Code | Consultant Geriatrician |                                        |               | Registrar Doctors in Geriatrics |           | Staff Grades <sup>c</sup> and Specialty Doctors | Geriatric Nurse Specialists |
|--------------|---------------|-------------------------|----------------------------------------|---------------|---------------------------------|-----------|-------------------------------------------------|-----------------------------|
|              |               | Total WTE <sup>a</sup>  | Total sessions per week for acute take | WTE Vacancies | Number NTN <sup>b</sup>         | Total WTE | Total WTE                                       | Total WTE                   |
| C            | 1             | 3                       | 7                                      | 4             | 1                               | 0         | 0                                               | 0                           |
|              | 2             | 2.2                     | 0.4                                    | 2             | 0                               | 0         | 0                                               | 4                           |
| I            | 3             | 5                       | 5                                      | 1             | 1                               | 2         | 0                                               | 1.4                         |
| D            | 4             | 2.5                     | 0                                      | 2             | 0                               | 0         | 3                                               | 0                           |
| G            | 5             | 9.8                     | 64.5                                   | 1.5           | 2                               | 1         | 0.9                                             | 3                           |
| J            | 6             | 13                      | 32                                     | 1             | 3                               | 3         | 2                                               | 0                           |
| F            | 8             | 1                       | 0.5                                    | 1.6           | 0                               | 0         | 0                                               | 2                           |
|              | 7             | 11.2                    | 41.75                                  | 3             | 8                               | 6.4       | 0                                               | 4                           |
| L            | 9             | 17                      | 24                                     | 1.6           | 8                               | 5.8       | 1.4                                             | 4                           |
|              | 11            | 6.4                     | 5                                      | 1             | 1                               | 0         | 1.8                                             | 3                           |
|              | 10            | 19                      | 23                                     | 1             | 8                               | 7.4       | 4.6                                             | 5.8                         |
|              | 12            | 2                       | 2.5                                    | 2             | 0                               | 0         | 1                                               | 2                           |
| E            | 24            | 0.5                     | 0                                      | 5             | 0                               | 0         | 0                                               | 0                           |
|              | 23            | 4.75                    | 0                                      | 0             | 0                               | 0         | 2.6                                             | 0                           |
|              | 21            | 1                       | 0                                      | 0             | 0                               | 0         | 0                                               | 0                           |
|              | 22            | 0                       | 0                                      | 1             | 0                               | 0         | 0                                               | 0                           |
| K            | 14            | 10                      | 18                                     | 2             | 3                               | 2         | 3.1                                             | 5                           |
|              | 15            | 8.5                     | 9                                      | 0             | 2                               | 2         | 0                                               | 3                           |
|              | 13            | 10                      | 11                                     | 0.4           | 2                               | 0.4       | 2                                               | 4                           |
| M            | 18            | 11.4                    | 6.5                                    | 0             | 3                               | 3         | 2.2                                             | 9                           |
|              | 16            | 6.7                     | 2                                      | 2             | 2                               | 1         | 0.4                                             | 1                           |
|              | 17            | 20                      | 11                                     | 1             | 3                               | 3         | 6                                               | 2                           |
| A            | 25            | 0                       | 0                                      | 0             | 0                               | 0         | 0                                               | 0                           |
| H            | 20            | 8                       | 15                                     | 1             | 8                               | 4         | 6                                               | 0                           |
|              | 19            | 6                       | 10                                     | 1             | 1                               | 2         | 3                                               | 1                           |
| B            | 26            | 0                       | 0                                      | 5             | 0                               | 0         | 0                                               | 0                           |

<sup>a</sup>Whole Time Equivalent

<sup>b</sup>National Training Number

<sup>c</sup>Staff grade are doctors at least two years into specialty training however are not in a consultant training pathway.
