# Supplementary material for: Postcode Lottery in Healthcare? Findings from the Scottish National Comprehensive Geriatric Assessment in Secondary Care Audit 2019
Source: MDPI journal article supplement (doi:10.3390/healthcare10010161), 2022-01-14
Supplement: s1 [file s1]

| Health Board | Hospital Code | Unit Name                                                   | Where is the discrete area for geriatric acute assessment? | Age criteria for admission | Other criteria for admission                                                                                                                                                     |
|--------------|---------------|-------------------------------------------------------------|------------------------------------------------------------|----------------------------|----------------------------------------------------------------------------------------------------------------------------------------------------------------------------------|
| F            | 8             | Acute Care of Elderly Unit (ACE)                            | Set beds within a general ward                             | No                         | Frailty assessment tool from HIS                                                                                                                                                 |
| F            | 7             | Geriatric Assessment Unit (GAU)                             | Separate assessment unit run 7 days a week                 | No                         | Typically over 75 years with frailty syndromes. Exclude patients more appropriately dealt with by subspecialty                                                                   |
| L            | 9             | Acute Frailty Unit                                          | Separate assessment unit run 7 days a week                 | 65 years and over          | No                                                                                                                                                                               |
| L            | 11            | Older Adults Assessment Unit                                | Separate assessment unit run weekday during daytime        | 75 years and over          | Think Frailty screening tool (minimum of 1 criterion). Functional impairment, significant multiple morbidities, resident in care home, 4AT, dementia, mobility and polypharmacy. |
| L            | 10            | Acute receiving unit 4: Department medicine for the elderly | Separate assessment unit run 7 days a week                 | 75 years and over          | Frail according to HIS and do not need another specialty. Also over 65 from nursing homes.                                                                                       |
| K            | 14            | Frailty unit                                                | Set beds within a general ward                             | 65 years and over          | Frailty screened, then all ages from care homes.                                                                                                                                 |
| H            | 20            | Acute Medicine for Elderly (AME) Unit                       | Separate assessment unit run 7 days a week                 | No                         | Frailty screening tool, polypharmacy, mobility, cognition, fall and help with ADLs                                                                                               |
