# Supplementary material for: Postcode Lottery in Healthcare? Findings from the Scottish National Comprehensive Geriatric Assessment in Secondary Care Audit 2019
Source: MDPI journal article supplement (doi:10.3390/healthcare10010161), 2022-01-14
Supplement: s1 [file s1]

# SCoOP Steering Group

## Co-Chairs

Prof P K Myint (University of Aberdeen)

Prof G Ellis (NHS<sup>a</sup> Lanarkshire)

## Secretary

Dr AIC Donaldson (University of Aberdeen)

## Members

Dr L Beveridge - NHS<sup>a</sup> Tayside

Prof C Black - Grampian DASH<sup>b</sup>

Mr S Buchanan - NHS<sup>a</sup> Scotland

Dr J Burns - BGS<sup>c</sup> Scotland

Dr T Byrne - NHS<sup>a</sup> Forth Valley

Dr A Conley - Dumfries & Galloway

Dr A Coull - NHS<sup>a</sup> Lothian

Dr A Einarsson - NHS<sup>a</sup> Shetland

Dr G Hoyle - NHS<sup>a</sup> Grampian

Mrs G Jordan - HIS<sup>d</sup>

Dr A MacDonald - NHS<sup>a</sup> Highland

Dr C McAlpine - BGS<sup>c</sup> Scotland

Dr M McElroy - NHS<sup>a</sup> Glasgow & Clyde

Dr T Quinn - University of Glasgow

Mr G Ramsay - Scottish Surgical Research Group

Prof Sir L Ritchie - University of Aberdeen

Dr S Shenkin - University of Edinburgh

Dr R L Soiza - Scottish Society of Physicians

Dr R Thomas - NHS<sup>a</sup> Fife

Dr A Watt - NHS<sup>a</sup> Ayrshire & Arran

Mrs K Wood - Pharmacy SIG<sup>e</sup>

Dr D MacDonald – Modernising Patient Pathways Programme

<sup>a</sup>National Health Service

<sup>b</sup>Aberdeen Centre for Health Data Science

<sup>c</sup>British Geriatric Society

<sup>d</sup>Health Improvement Scotland

<sup>e</sup>Special Interest Group
