# Supplementary material for: Postcode Lottery in Healthcare? Findings from the Scottish National Comprehensive Geriatric Assessment in Secondary Care Audit 2019
Source: Healthcare (Basel). 2022 Jan 14;10(1):161. doi: 10.3390/healthcare10010161 (PMC8775440; doi:10.3390/healthcare10010161)
Supplement: Supplementary file 1 [file healthcare-10-00161-s001.zip]

Archive with 12 entries (12 files):
- Supplementary S1 - SCoOP Steering Group.pdf
- Supplementary S10 - Physiotherapy V1.0.pdf
- Supplementary S11 - Occupational Therapy v1.0.pdf
- Supplementary S12 - MDTs v1.0.pdf
- Supplementary S2 - audit questions.pdf
- Supplementary S3 - Remote and Rural Questions.pdf
- Supplementary S4 - Frailty Unit v1.0.pdf
- Supplementary S5 - No Frailty Unit v1.0.pdf
- Supplementary S6 - Routes into Geriatrics v1.0.pdf
- Supplementary S7 - Medical and ANP Staffing v1.0.pdf
- Supplementary S8 - Consultant Hours Reviewing New Admissions v1.0.pdf
- Supplementary S9 - AHP and psych  v1.0.pdf
